# Supplementary material
Source: ML conference proceedings conference paper supplement (https://openreview.net/forum?id=CwQCeJnteii)
Supplement: supplementary_material [file attachment]

## A Appendix

### A.1 Visualization of patch-wise noise sensitivity

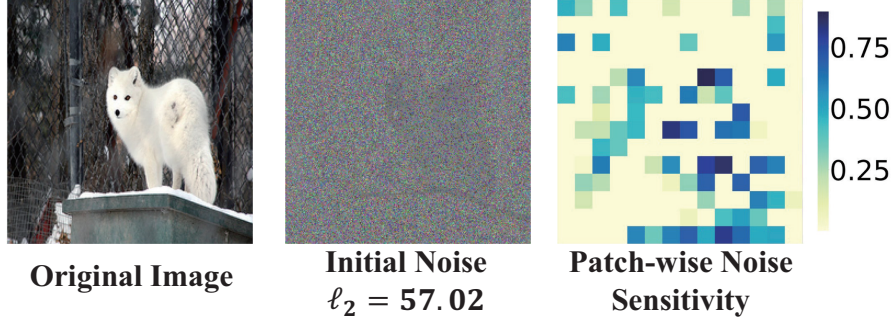

Figure 1: Illustrations of original images (left), initial random noises (middle), and corresponding visualizations of patch-wise noise sensitivity (right).

Existing decision-based attack methods use random noises to initialize adversarial examples  $x^{init}$  [1, 2, 3, 4]. For example, a common practice is to add Gaussian noise with mean of 0 and a gradually increasing variance on the original image until the target model is misclassified:

$$x^{init} = \text{Clip}_{x,\tau}\{x + \xi^{Gau}\}, \quad \xi^{Gau} \sim \mathcal{N}(0, \text{var}^2 I), \quad (1)$$

where  $\xi^{Gau}$  refers to the random noise with the same dimension as the original image  $x$  and follows the Gaussian distribution with mean of 0 and variance of  $\text{var}$ .  $I$  is an identity matrix of the same dimension as  $x$ . The decision-based attack can only obtain the hard-label returned by the target model, and the attacker does not have any prior knowledge about the target model. Therefore, the noise  $z^{init}$  on the initial adversarial example is generally uniform at each pixel, as shown in the middle column of Fig. 1. After adding random noises to the original image until misclassification, the decision-based attacks use the initial adversarial example as the starting point of the noise compression process.

Fig. 2 compares the differences of patch-wise noise sensitivity between res-101 and r26-32. It can be seen that only removing the noises on a few patches on the res-101 will affect the misclassification, while the patch-wise noise sensitivity on r26-32 varies greatly. This reflects the reason why it is difficult to attack ViTs using existing decision-based attacks.

### A.2 Proof of Proposition 1

**Proposition 1.** Assume  $x'$  is an initial adversarial example generated by Boundary Attack against ViT  $F$  starting from original image  $x$ ,  $F(x) \neq F(x')$ . For any  $0 < r_1, r_2, h \leq \text{Height}$ ,  $0 < c_1, c_2, w \leq \text{Width}$ , if  $\text{Sens}(F, x, x', r_1, c_1, h, w) < \text{Sens}(F, x, x', r_2, c_2, h, w)$ , and the new noise added by one step by Boundary Attack is  $z'$ , then  $P(F(x' + z') \neq F(x) | F(x' + z') = F(x)) < P(F(x' + z'_2) \neq F(x) | F(x' + z'_2) = F(x))$ , where for  $\iota = 1, 2$

$$z'_{\iota, r, c} = \begin{cases} 0, & \text{if } r_\iota \leq r < r_\iota + h \text{ and } c_\iota \leq c < c_\iota + w, \\ z'_{r, c}, & \text{else,} \end{cases} \quad (2)$$

*Proof.* According to the attack process of Boundary Attack:

$$x_{new}^* = x^* + \delta \cdot \frac{\eta}{\|\eta\|_2} + \varepsilon \cdot \frac{x - x^*}{\|x - x^*\|_2}, \quad \eta \sim \mathcal{N}(0, I), \quad (3)$$

New noise  $z' \sim \mathcal{N}(\varepsilon \cdot \frac{x - x'}{\|x - x'\|_2}, \delta^2)$ . Noise compression ratio after one-step Boundary Attack satisfies  $\frac{z'}{x' - x} \sim \mathcal{N}(\frac{\varepsilon}{\|x - x'\|_2}, \frac{\delta^2}{(x - x')^2})$ . Since the initial noise  $x'$  generated by Boundary Attack follows Gaussian distribution with mean of 0 and equal variance on each pixel, the expectation of the initial noise is equal. Therefore, the noise compression ratio after one-step Boundary Attack for each

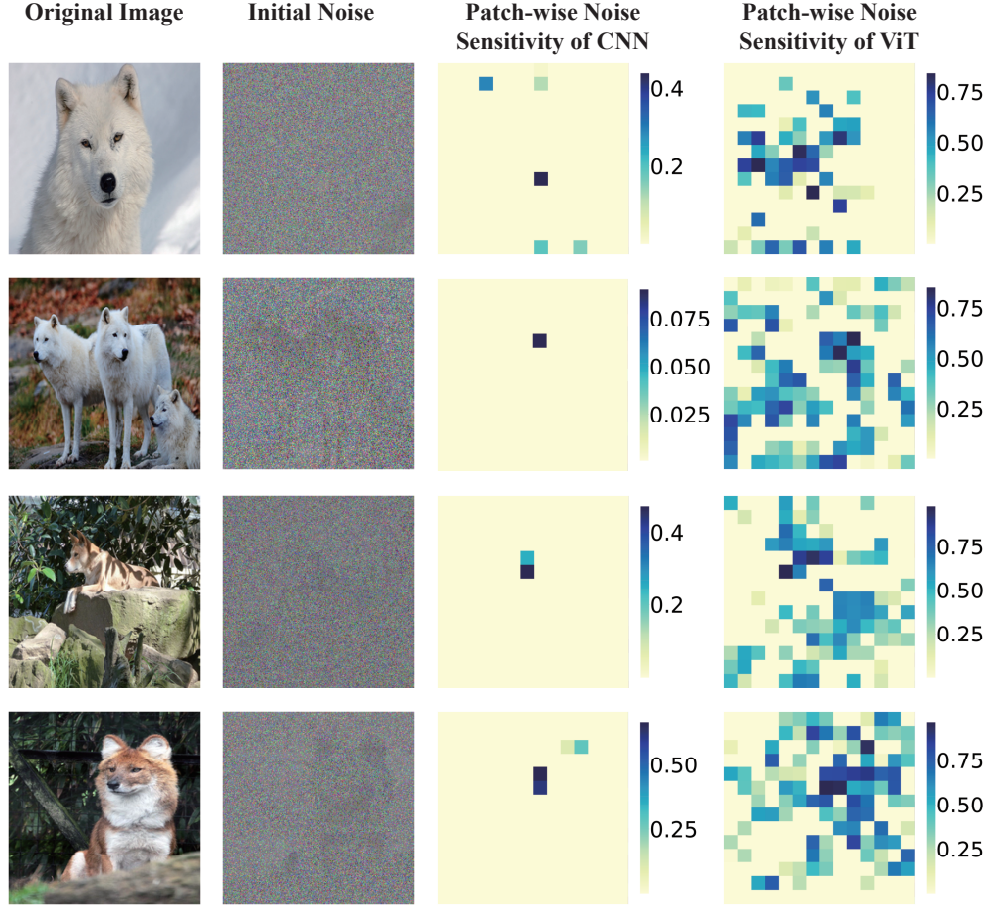

Figure 2: Comparison of patch-wise noise sensitivity between res-101 and r26-32 on ILSVRC-2012.

pixel is i.i.d. The possibility that the noise compression ratio on at least one pixel exceeds  $\kappa$  is the same for any pixel:

$$P(\exists \quad 0 < r^* \leq \text{Height} \quad \text{and} \quad 0 < c^* \leq \text{Width}, \frac{z'_{r^*, c^*}}{x' - x} > \kappa), \quad (4)$$

where  $0 < r^* \leq \text{Height}, 0 < c^* \leq \text{Width}, 0 < \kappa \leq 1$ . For any  $0 < \kappa_1 \leq \kappa_2 \leq 1$ :

$$P(\frac{z'_{r^*, c^*}}{x' - x} > \kappa_1) - P(\frac{z'_{r^*, c^*}}{x' - x} > \kappa_2) = P(\kappa_2 \geq \frac{z'_{r^*, c^*}}{x' - x} \geq \kappa_1) \geq 0, \quad (5)$$

$$P(\frac{z'_{r^*, c^*}}{x' - x} < \kappa_2) - P(\frac{z'_{r^*, c^*}}{x' - x} < \kappa_1) = P(\kappa_2 \geq \frac{z'_{r^*, c^*}}{x' - x} \geq \kappa_1) \geq 0, \quad (6)$$

The equality holds when  $\kappa_1 = \kappa_2$ . Since the probability that noise compression ratio on at least one pixel exceeds the noise sensitivity  $Sens$  increases monotonically with respect to the noise sensitivity on the whole patch, and  $Sens(F, x, x', r_1, c_1, h, w) < Sens(F, x, x', r_2, c_2, h, w)$ , we have:

$$\begin{aligned} & P(F(x' + z'_2) \neq F(x) | F(x' + z') = F(x)) \\ &= P(\exists r_2 \leq r_2^* \leq r_2 + h \text{ and } c_2 \leq c_2^* \leq c_2 + w, \frac{z'_{r_2^*, c_2^*}}{x' - x} < Sens(F, x, x', r_2, c_2, h, w)) \\ &> P(\exists r_1 \leq r_1^* \leq r_1 + h \text{ and } c_1 \leq c_1^* \leq c_1 + w, \frac{z'_{r_1^*, c_1^*}}{x' - x} < Sens(F, x, x', r_1, c_1, h, w)) \\ &= P(F(x' + z'_1) \neq F(x) | F(x' + z') = F(x)). \end{aligned} \quad (7)$$

Table 1: Median and average  $\ell_2$  distance of adversarial perturbations on ILSVRC-2012 against 4 ViTs.

| Target       | ti_l16       |              | r_ti_l16     |              | vit_s32      |              | vit_b16      |               |
|--------------|--------------|--------------|--------------|--------------|--------------|--------------|--------------|---------------|
| Methods      | Mid          | Avg          | Mid          | Avg          | Mid          | Avg          | Mid          | Avg           |
| Initial      | 122.666      | 121.669      | 49.142       | 47.79        | 79.332       | 74.452       | 104.872      | 95.847        |
| PAR          | 25.372       | 58.037       | 5.353        | 6.5          | 11.82        | 16.149       | 17.518       | 32.103        |
| HSJA         | 79.806       | 91.875       | 28.195       | 30.339       | 57.971       | 51.718       | 76.448       | 73.613        |
| PAR+HSJA     | 24.363       | 56.813       | 5.194        | 6.316        | 11.451       | 15.842       | 15.599       | 31.158        |
| BBA          | 26.871       | 58.071       | 4.767        | 7.091        | 8.887        | 12.957       | 16.682       | 30.617        |
| PAR+BBA      | 19.215       | 53.288       | 2.932        | 4.465        | 5.309        | 11.292       | 11.737       | 26.72         |
| Evo          | 35.033       | 65.997       | 7.042        | 10.81        | 11.805       | 17.721       | 28.219       | 40.623        |
| PAR+Evo      | 20.887       | 55.168       | 4.201        | 5.578        | 9.166        | 13.339       | 13.358       | 28.76         |
| Boundary     | 39.43        | 66.223       | 9.116        | 12.512       | 18.191       | 20.409       | 26.333       | 38.064        |
| PAR+Boundary | 21.075       | 55.263       | 4.62         | 5.971        | 10.452       | 14.368       | 13.842       | 29.304        |
| SurFree      | 30.971       | 61.017       | 5.69         | 9.325        | 11.024       | 15.758       | 17.341       | 33.533        |
| PAR+SurFree  | 18.868       | 53.815       | 3.899        | 5.229        | 8.454        | 12.885       | 12.18        | 27.57         |
| CAB          | 57.069       | 77.707       | 4.071        | 10.841       | 13.122       | 22.509       | 26.268       | 48.165        |
| PAR+CAB      | 15.209       | 52.193       | <b>2.627</b> | <b>4.419</b> | <b>5.156</b> | 10.598       | <b>8.171</b> | 25.306        |
| Sign-OPT     | 34.884       | 38.06        | 114.027      | 113.639      | 40.168       | 41.231       | 71.778       | 65.801        |
| PAR+Sign-OPT | <b>5.264</b> | <b>6.793</b> | 23.801       | 53.313       | 5.18         | <b>6.135</b> | 10.696       | <b>15.447</b> |

Table 2: Median and average  $\ell_2$  distance of adversarial perturbations on ILSVRC-2012 against ViTs.

| Target       | vit_b32      |               | r50_l32      |               | ti_sl6       |              |
|--------------|--------------|---------------|--------------|---------------|--------------|--------------|
| Methods      | Mid          | Avg           | Mid          | Avg           | Mid          | Avg          |
| Initial      | 97.8         | 89.433        | 70.962       | 79.394        | 41.607       | 42.921       |
| PAR          | 15.897       | 26.216        | 13.083       | 26.662        | 5.449        | 7.772        |
| HSJA         | 65.213       | 64.582        | 46.57        | 56.298        | 24.181       | 28.403       |
| PAR+HSJA     | 15.376       | 25.845        | 11.106       | 25.49         | 4.897        | 7.538        |
| BBA          | 11.835       | 24.534        | 14.954       | 24.47         | 4.182        | 5.99         |
| PAR+BBA      | 10.196       | 22.026        | 9.775        | 22.162        | 2.787        | 4.772        |
| Evo          | 17.234       | 30.62         | 19.952       | 28.534        | 6.616        | 8.872        |
| PAR+Evo      | 12.179       | 23.134        | 10.159       | 22.639        | 4.39         | 6.182        |
| Boundary     | 21.407       | 31.815        | 21.173       | 31.358        | 8.296        | 10.757       |
| PAR+Boundary | 13.786       | 24.294        | 10.506       | 24.255        | 4.818        | 6.705        |
| SurFree      | 14.838       | 27.774        | 16.263       | 26.861        | 4.386        | 7.701        |
| PAR+SurFree  | 11.684       | 22.92         | 9.381        | 22.719        | 3.701        | 5.76         |
| CAB          | 19.376       | 38.092        | 19.226       | 33.201        | 4.559        | 10.665       |
| PAR+CAB      | <b>8.949</b> | <b>21.314</b> | <b>7.894</b> | <b>22.077</b> | <b>2.158</b> | <b>4.594</b> |
| Sign-OPT     | 95.78        | 88.212        | 88.657       | 81.727        | 34.884       | 38.06        |
| PAR+Sign-OPT | 16.477       | 31.713        | 15.212       | 25.67         | 5.264        | 6.793        |

Therefore,  $P(F(x' + z'_1) \neq F(x) | F(x' + z') = F(x)) < P(F(x' + z'_2) \neq F(x) | F(x' + z') = F(x))$ .  $\square$

Although the sensitivity evaluation of PAR slightly resembles that of  $\ell_0$  sparse attacks [7, 8], there are huge differences which make the comparison hardly possible. Firstly, the goal of PAR is to compress noise from initial adversarial examples while the goal of  $\ell_0$  attacks is to minimize the number of perturbed pixels. Secondly,  $\ell_0$  attacks usually need some additional information, e.g., random adversarial images for sparse decomposition in LSDAT [7], while PAR only needs hard label of the target model.

Boundary Attack’s ignorance of the difference in noise sensitivity between patches results in two serious consequences. First of all, since the initial noise  $z^{init}$  and compression noise are uniform for each pixel, the magnitude of noise on each pixel after multiple steps of compression is also close. When the noise in the most sensitive region of the image is compressed, it is difficult for the updated adversarial example to maintain misclassification, and the subsequent query is likely to fail. To some extent, this explains why the noise compression efficiency of Boundary Attack gradually decreases as the query number grows [1].

Except for Boundary Attack, most of the existing decision-based attack methods are essentially local random search starting from a random noise. For example, SurFree [9] focuses on the geometric properties in the neighborhood of current adversarial example  $x^*$ . HSJA [3] estimates the decision boundary near  $x^*$ . BBA [4] and CAB [10] samples in the entire image space based on  $x^*$  with adaptive

Table 3: Median and average  $\ell_2$  distance of adversarial perturbations between four models on ImageNet-21k.

| Target       | vit_s32      |             | vit_b16     |              | vit_b_32     |              | r50_s32      |              |
|--------------|--------------|-------------|-------------|--------------|--------------|--------------|--------------|--------------|
| Methods      | median       | average     | median      | average      | median       | average      | median       | average      |
| Initial      | 42.939       | 47.117      | 28.839      | 44.511       | 34.515       | 44.885       | 56.912       | 41.267       |
| PAR          | 4.968        | 7.814       | 5.637       | 10.397       | 5.614        | 9.699        | 3.191        | 9.306        |
| HSJA         | 24.728       | 27.328      | 16.244      | 27.895       | 20.486       | 29.87        | 38.993       | 29.514       |
| PAR+HSJA     | 4.573        | 7.487       | 4.476       | 9.684        | 5.185        | 9.159        | 2.218        | 7.788        |
| BBA          | 4.008        | 6.063       | 4.012       | 10.119       | 4.086        | 8.264        | 8.666        | 17.211       |
| PAR+BBA      | 2.162        | 4.482       | 3.202       | 8.071        | 2.877        | 6.431        | 2.218        | 7.322        |
| Evo          | 5.311        | 7.617       | 5.562       | 12.347       | 6.107        | 11.24        | 14.355       | 13.757       |
| PAR+Evo      | 3.361        | 5.728       | 3.965       | 8.777        | 4.335        | 8.134        | 2.218        | 8.006        |
| Boundary     | 8.012        | 9.768       | 7.519       | 13.406       | 7.822        | 12.011       | 12.587       | 15.687       |
| PAR+Boundary | 4.265        | 6.324       | 4.42        | 9.176        | 4.737        | 8.372        | 2.218        | 8.55         |
| SurFree      | 4.996        | 6.319       | 3.343       | 9.349        | 4.725        | 8.64         | 6.83         | 13.943       |
| PAR+SurFree  | 2.951        | 5.387       | 3.412       | 8.187        | 3.608        | 7.291        | <b>2.218</b> | 8.067        |
| CAB          | 4.749        | 8.815       | 2.4         | 9.127        | 4.749        | 11.391       | 8.275        | 13.307       |
| PAR+CAB      | <b>1.696</b> | <b>4.24</b> | <b>1.72</b> | <b>6.235</b> | <b>2.225</b> | <b>6.007</b> | <b>2.218</b> | <b>5.437</b> |
| Sign-OPT     | 27.239       | 36.776      | 23.278      | 38.681       | 24.656       | 37.362       | 47.589       | 36.398       |
| PAR+Sign-OPT | 4.335        | 7.057       | 5.251       | 10.238       | 4.728        | 8.353        | 2.684        | 8.793        |

Table 4: Noise compression comparison when minimum patch size  $PS_{min} = 1$ .

|         | Initial Patch Size | 112    | 56     | 28     | 14     | 7      |
|---------|--------------------|--------|--------|--------|--------|--------|
|         | Minimum Patch Size | 1      | 1      | 1      | 1      | 1      |
| vgg-19  | Mid Noise          | 4.73   | 4.95   | 5.20   | 5.98   | 13.05  |
|         | Avg Noise          | 6.32   | 6.31   | 6.55   | 7.05   | 11.31  |
|         | Avg Query Number   | 810.22 | 811.86 | 835.30 | 882.28 | 945.43 |
| vit_s16 | Mid Noise          | 8.89   | 8.97   | 9.38   | 11.88  | 24.93  |
|         | Avg Noise          | 17.68  | 17.53  | 17.49  | 18.90  | 26.84  |
|         | Avg Query Number   | 825.60 | 831.32 | 855.66 | 909.22 | 969.57 |

distribution. Existing decision-based attack methods mainly focus on searching for adversarial examples with smaller noise magnitude in the neighborhood of current adversarial example, but ignore the noise in  $x^{init}$  with larger magnitude and easier to compress due to the difference in noise sensitivity.

### A.3 More Experimental Results

To further verify the advantage of PAR over existing decision-based attacks on different ViTs and CNNs, we report the median and average adversarial perturbation of more target models on ILSVRC-2012 and ImageNet-21k in Table 1, Table 2, and Table 3. The first row of three tables represents target models with different structures. We compare the average (Avg) and median (Mid) noise magnitude generated by PAR and other 6 attacks on different target models. We also use PAR as the noise initialization for other decision-based attacks. The noise compressed by PAR is handed over to other decision-based attacks for further compression. It can be seen that when PAR is used to initialize adversarial noise, the average and median noise magnitude drops significantly compared with only using the original decision-based attack. This verifies the strong noise compression ability of PAR.

In Table 4 we add experimental results with a minimum patch size of 1. A minimum patch size of 1 means that PAR will try to remove noise on a single pixel. It can be seen from the results that using a too small minimum patch size will also lead to low compression efficiency. Because when  $PS_{min} = 1$ , a single query can only remove noise on a single pixel at most even if it succeeds. At the same time, the number of queries consumed by PAR will also increase sharply with a too small minimum patch size.

In Table 5, we compare the time consumption and noise compression efficiency of PAR and other decision-making attacks on the Imagenet. The target model is r-ti-16. The total number of queries is 1000 times. Among them, the first 50 times are used for generating Gaussian noise to find initial

Table 5: Comparison of time cost and compression efficiency.

| Methods      | Time Cost (s) | Used step | Time Per Query (s) | Noise Compression Per Query |
|--------------|---------------|-----------|--------------------|-----------------------------|
| PAR          | 2.22          | 60        | 0.037              | <b>0.673</b>                |
| Evo          | 28.28         | 950       | 0.030              | 0.035                       |
| PAR+Evo      | 27.22         | 950       | <b>0.029</b>       | 0.045                       |
| Boundary     | 31.37         | 950       | 0.033              | 0.040                       |
| PAR+Boundary | 34.72         | 950       | 0.037              | 0.044                       |
| CAB          | 36.09         | 950       | 0.038              | 0.044                       |
| PAR+CAB      | 70.15         | 950       | 0.074              | 0.047                       |

adversarial examples. When PAR is not applied, the next 950 times are all used for decision-based attacks. When initialized with PAR, 60 queries are used for PAR, and then the remaining 890 queries are used for decision-based attack. The experimental results report the total time consumption, number of queries, query time per query and average compression noise per query. Since the main time-consuming of the query lies in the forward propagation process of the target model, the used time of a single query for each method is similar. But it can be seen that the noise compression efficiency of each decision attack method is improved after initializing with PAR. During the first 60 queries of PAR, the noise compression efficiency is significantly higher than other decision-based attacks, which demonstrates the effectiveness of PAR.

## References

- [1] J. R. Wieland Brendel and M. Bethge, “Decision-based adversarial attacks: Reliable attacks against black-box machine learning models,” in *ICLR*, 2018.
- [2] Y. Dong, H. Su, B. Wu, Z. Li, W. Liu, T. Zhang, and J. Zhu, “Efficient decision-based black-box adversarial attacks on face recognition,” in *CVPR*, 2019.
- [3] J. Chen, M. I. Jordan, and M. J. Wainwright, “Hopskipjumpattack: A query-efficient decision-based attack,” in *2020 IEEE Symposium on Security and Privacy (SP)*. IEEE, 2020, pp. 1277–1294.
- [4] T. Brunner, F. Diehl, M. T. Le, and A. Knoll, “Guessing smart: Biased sampling for efficient black-box adversarial attacks,” in *ICCV*, 2019, pp. 4958–4966.
- [5] R. Wightman, “Pytorch image models,” <https://github.com/rwightman/pytorch-image-models>, 2019.
- [6] O. Russakovsky, J. Deng, H. Su, J. Krause, S. Satheesh, S. Ma, Z. Huang, A. Karpathy, A. Khosla, M. Bernstein *et al.*, “Imagenet large scale visual recognition challenge,” *International Journal of Computer Vision*, vol. 115, no. 3, pp. 211–252, 2015.
- [7] A. Esmaeili and M. Edraki, “Lsdatt: Low-rank and sparse decomposition for decision-based adversarial attack,” *arXiv*, 2021.
- [8] J. Su, D. V. Vargas, and K. Sakurai, “One pixel attack for fooling deep neural networks,” *IEEE TEC*, 2019.
- [9] T. Maho, T. Furon, and E. Le Merrer, “Surfree: a fast surrogate-free black-box attack,” in *CVPR*, 2021, pp. 10 430–10 439.
- [10] Y. Shi, Y. Han, and Q. Tian, “Polishing decision-based adversarial noise with a customized sampling,” in *CVPR*, 2020, pp. 1030–1038.
